# Supplementary material for: Cardiac Hamp mRNA Is Predominantly Expressed in the Right Atrium and Does Not Respond to Iron
Source: MDPI journal article supplement (doi:10.3390/ijms24065163), 2023-03-08
Supplement: s1 [file s1]

Table S1. List of primers used for qPCR.

| Gene                 | GenBank accession | Forward primer sequence        | Reverse primer sequence        |
|----------------------|-------------------|--------------------------------|--------------------------------|
| <i>Hamp</i>          | NM_032541.1       | <i>AAGCAGGGCAGACATTGCGAT</i>   | <i>CAGGATGTGGCTCTAGGCTATGT</i> |
| <i>Rpl19</i>         | NM_009078.2       | <i>AGGCATATGGGCATAGGGAAGAG</i> | <i>TTGACCTTCAGGTACAGGCTGTG</i> |
| <i>Acta1</i>         | NM_001272041.1    | <i>CGTGAAGCCTCACTTCCTACC</i>   | <i>CGGCTTGTTCACTTGCAGGA</i>    |
| <i>Nr2f1</i>         | NM_010151.4       | <i>TGGCCTTCATGGACCACATC</i>    | <i>TGCTCGATGACAGAGGAGGA</i>    |
| <i>Hjv</i>           | NM_027126.4       | <i>ATCCCCATGTGCGCAGTTT</i>     | <i>GCTGGTGGCCTGGACAAA</i>      |
| <i>Smad7</i>         | NM_001042660.1    | <i>CGGACAGCTCAATTCGGAC</i>     | <i>GGTAACTGCTGCGGTTGTAA</i>    |
| <i>Slc40a1(+IRE)</i> | NM_016917.2       | <i>GGCATAAGGCTGTTGTGCTT</i>    | <i>TCATGACACCAGGCGTTCTC</i>    |
| <i>Il6</i>           | NM_031168.2       | <i>AGCCAGAGTCCTTCAGAGAGA</i>   | <i>GGTCTTGGTCCTTAGCCACTC</i>   |
| <i>HAMP</i>          | NM_021175         | <i>ATGGCACTGAGCTCCCAGAT</i>    | <i>ACTTTGATCGATGACAGCAG</i>    |
| <i>RPS18</i>         | NM_022551         | <i>TGTGGTGTTGAGGAAAGCAG</i>    | <i>AAGTGACGCAGCCCTCTATG</i>    |
| <i>SMAD7</i>         | NM_005904.4       | <i>ACTTCTTCATGGTGTGCGGA</i>    | <i>AATTGAGCTGTCCGAGGCAA</i>    |
